# Supplementary material
Source: Springer Nature journal article supplement (https://www.springermedizin.de/resource/supplementary/13033_2010_63_MOESM2_ESM.pdf/9651744)

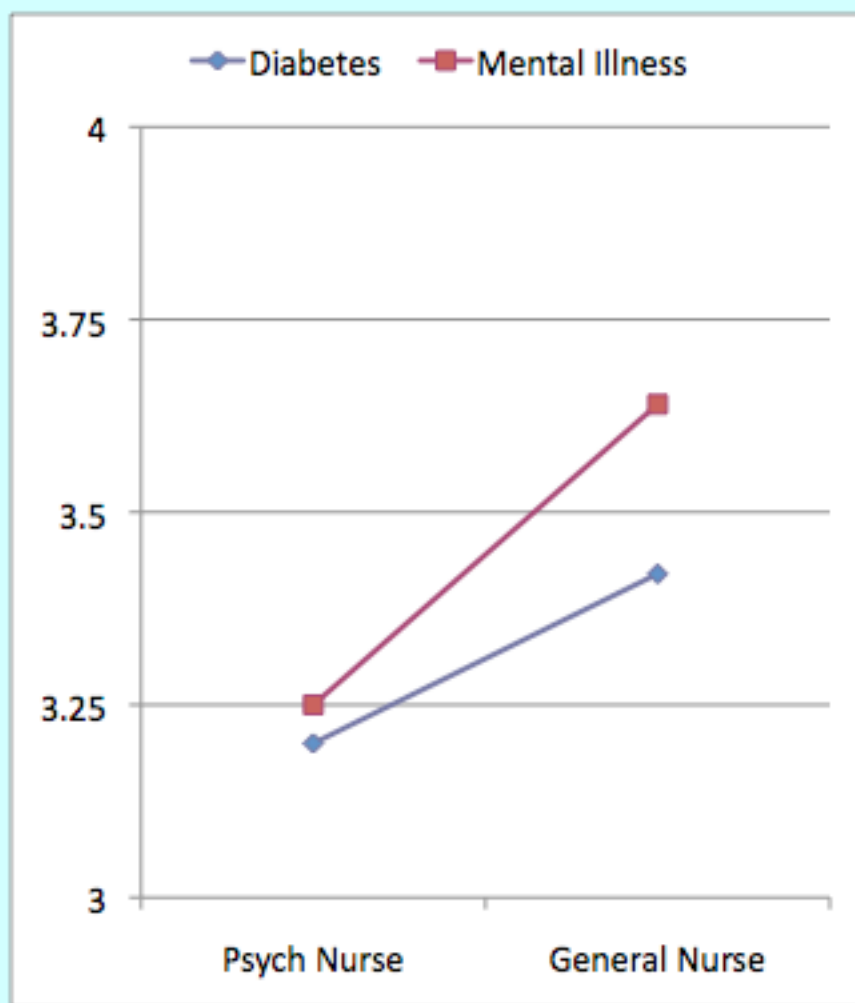

**Caring/Support**

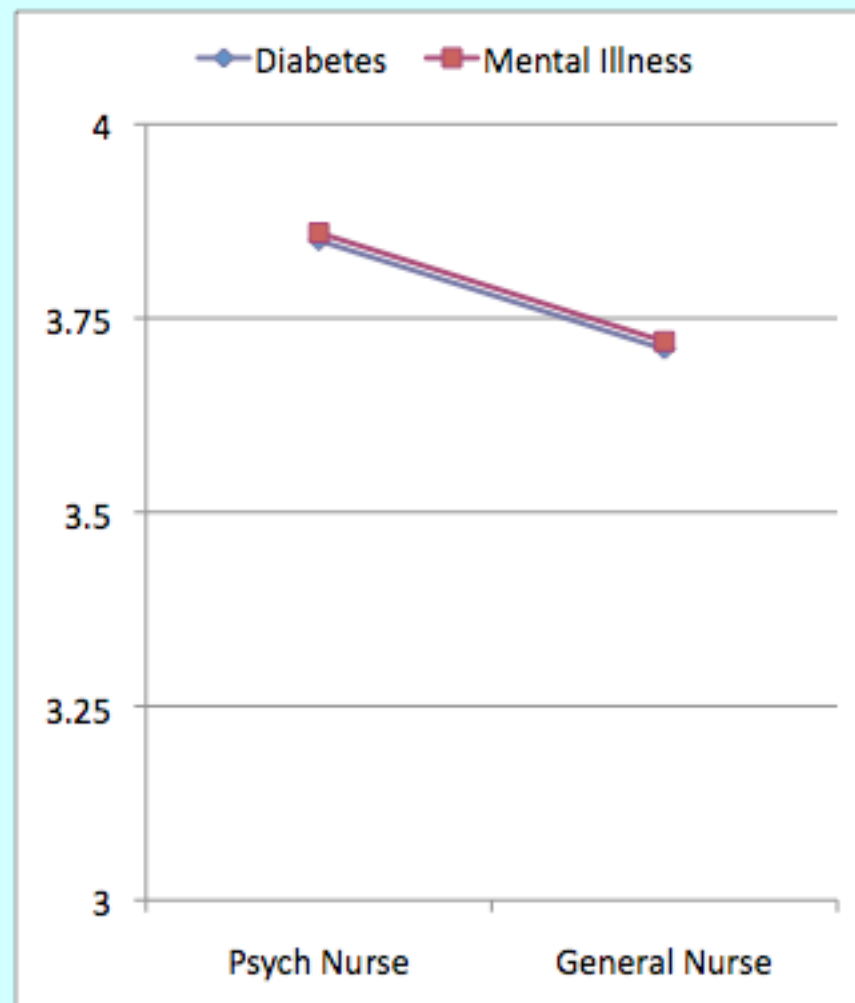

**Satisfaction**

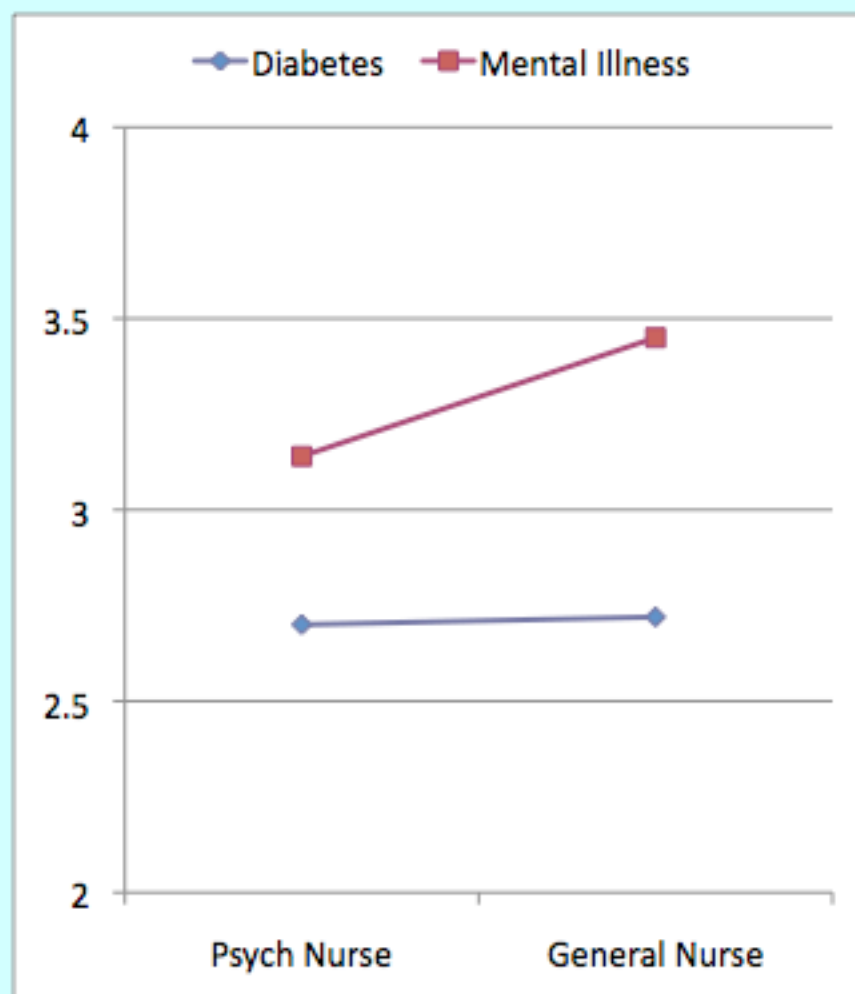

**Authoritarian**

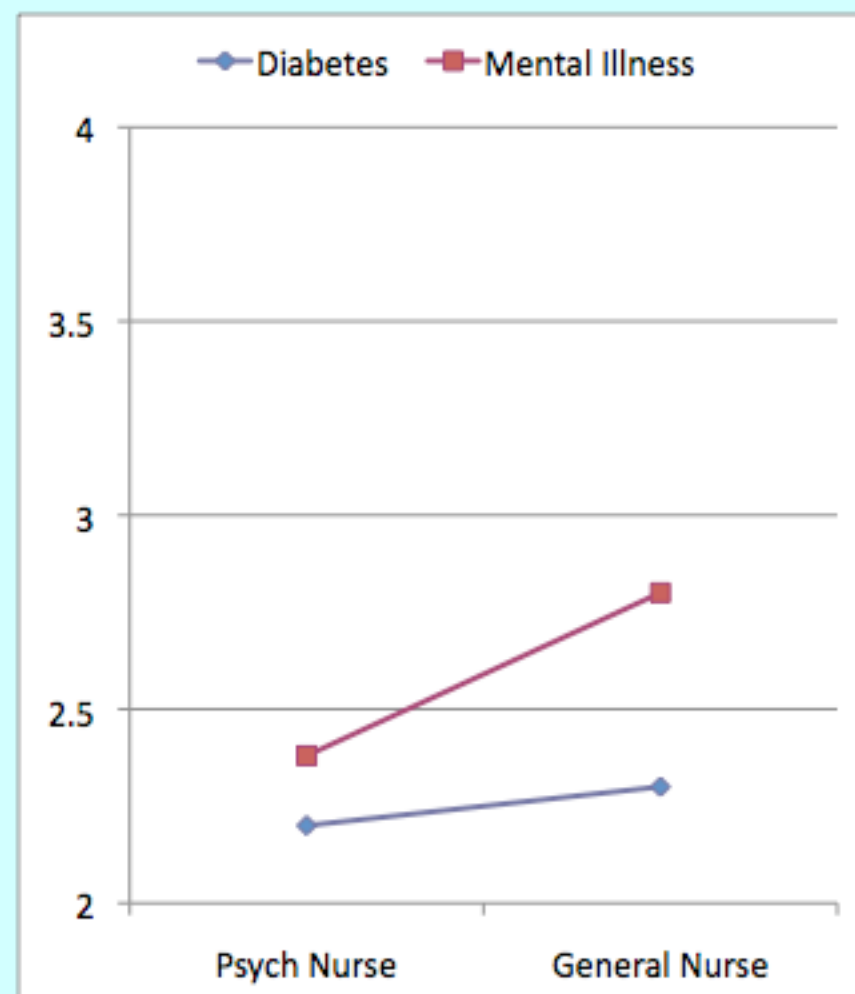

**Negativity**

Supplement: MOESM2 [file 9651744]
